# Supplementary material for: Extracellular Vesicles Secreted by Neospora caninum Are Recognized by Toll-Like Receptor 2 and Modulate Host Cell Innate Immunity Through the MAPK Signaling Pathway
Source: Front Immunol. 2018 Jul 24;9:1633. doi: 10.3389/fimmu.2018.01633 (PMC6066505; doi:10.3389/fimmu.2018.01633)
Supplement: Table S1 — Protein repertoire identified in Neospora caninum extracellular vesicles (EVs) (XLSX). [file Table_1.XLSX]

## Sheet: 工作表1
Table S1 Protein repertoire identified in N.caninum Exosomes
Proteins	Peptides	PSMs	Unique Peptides	AAs	MW [kDa]	Score Mascot	Accession
surface protein P36	19	316	0	319	33	6778	AAF32519.1
p29 surface antigen, partial	18	289	1	273	28.4	6120	AAD39489.1
putative surface antigen protein 1	14	192	1	319	33.1	3021	AAO85715.1
microneme protein Nc-P38	22	106	22	362	38.1	2900	AAF19184.1
heavy polypeptide-like 1 (CLTCL1), transcript variant 1, mRNA, related	58	79	58	1732	194.5	2182	CBZ51215.1
unnamed protein product	23	75	23	594	66.8	1596	XP_003879744.1
tachyzoite surface protein	18	87	18	401	42	1559	AAX38600.1
conserved hypothetical protein	8	65	8	165	17.3	1202	CBZ51310.1
Cell division control protein 48 homolog A	33	41	28	801	88.1	1164	CEL67655.1
SRS domain-containing protein	17	68	6	391	41.1	1054	CEL71228.1
profilin PRF	31	42	31	1122	126.4	1026	XP_003886159.1
srs domain-containing protein	14	60	10	387	40.9	992	CBZ50604.1
SRS domain-containing protein	11	48	11	357	38.6	909	CEL70383.1
actin, related	16	33	16	376	41.9	786	CBZ49859.1
hypothetical protein NCLIV_032660	16	34	16	259	29.4	782	XP_003883511.1
srs domain-containing protein	13	41	0	406	41.9	764	CBZ50603.1
KH domain-containing protein, putative	20	25	20	950	101	746	CEL70275.1
conserved hypothetical protein	17	37	17	412	44.5	743	XP_003879576.1
Poly(ADP-ribose) glycohydrolase pme-3	23	28	23	520	58.7	741	CEL66156.1
SSU ribosomal protein S3P, related	10	28	10	235	26	691	XP_003883474.1
KH domain-containing protein, putative	22	30	22	678	75.9	681	CEL69307.1
Staphylococcal nuclease domain-containing protein 1	17	18	17	941	103.8	673	CEL65707.1
Fructose-1 6-biphosphatase, related	14	21	14	349	38.5	666	CBZ56098.1
elongation factor 1-alpha, related	17	22	17	448	49	665	XP_003879714.1
Myosin, heavy polypeptide 1, skeletal muscle,adult, related	25	25	25	822	91.3	650	CEL66663.1
subtilisin-like serine protease, partial	11	23	11	865	93.1	623	AAF04257.1
hypothetical protein BN1204_032270	15	24	15	330	35.2	613	CEL67427.1
S15 sporozoite-expressed protein	16	21	16	580	61.6	579	CEL66440.1
putative elongation factor 2	25	32	25	832	93	572	XP_003882268.1
Heat shock protein 70, related	18	21	17	671	72.6	559	CEL67598.1
kringle domain-containing protein	19	19	19	3133	345.4	543	CEL66811.1
hypothetical protein NCLIV_039400	19	27	19	704	78.6	542	CBZ50865.1
hypothetical protein NCLIV_047860	11	17	11	763	82.1	541	XP_003884386.1
DEAD/DEAH box helicase, putative	27	29	27	2275	257.8	537	CEL64231.1
50S ribosomal protein L4P, related	14	24	14	416	45.7	530	XP_003884959.1
DEAD-box ATP-dependent RNA helicase 34, related	14	18	14	411	46.5	515	CEL70968.1
dynamin-like protein, putative	23	24	23	870	96.6	513	CEL64534.1
Heat shock protein 70 (Precursor), related	14	15	13	666	72.9	511	CBZ55124.1
Putative 2-hydroxyacid dehydrogenase SACOL2296	12	14	12	604	65.4	510	CEL65811.1
unnamed protein product	17	18	17	1640	181	494	CBZ55111.1
hypothetical protein NCLIV_012890	21	22	21	7289	781.1	493	XP_003881528.1
Glucose-6-phosphate dehydrogenase, putative	14	20	13	561	62.9	492	CEL64180.1
eukaryotic translation initiation factor 3 subunit 6 interacting protein	15	21	15	643	75.2	491	XP_003883664.1
Nucleolar protein 56	11	12	11	544	60.3	490	CEL70855.1
HSP90-like protein, related	14	19	14	851	97	481	CBZ52122.1
hypothetical protein NCLIV_059430	10	12	10	321	35.2	480	CBZ55518.1
Eukaryotic translation initiation factor 3 subunit C, related	16	19	16	975	109.6	480	CEL64248.1
conserved hypothetical protein	7	14	7	195	21.1	476	XP_003886464.1
SCP family extracellular subfamily protein	7	21	7	262	28.4	472	CEL64153.1
hypothetical protein NCLIV_060420	25	27	25	781	88.4	468	CBZ55617.1
p97 protein, putative	20	22	20	847	97.7	463	CEL64853.1
unnamed protein product	11	15	11	1111	119	448	CBZ50757.1
Glutaminyl-tRNA synthetase, related	14	14	14	858	95.2	445	CEL70539.1
60S ribosomal protein L3, related	17	22	17	398	45	438	CEL68848.1
14-3-3 protein homolog	15	18	15	266	30.7	434	XP_003882726.1
AGC kinase TgPKG1, putative	17	17	17	997	111.6	432	CEL69827.1
TRNA synthetase Gly, related	16	19	16	771	86	429	CEL67199.1
Ribosomal protein S19e, related	4	22	4	160	18.3	427	CEL69194.1
40S ribosomal protein S4	13	25	13	263	30	424	CEL64351.1
Fatty acyl-CoA synthetase 2, related	13	15	13	767	84.2	422	CEL66021.1
conserved hypothetical protein	6	14	6	190	20.4	421	CBZ51533.1
putative myosin light chain 2	12	14	12	368	40.8	421	CBZ50173.1
calmodulin-like domain protein kinase isoenzyme gamma, related	19	28	16	506	57.1	421	XP_003880764.1
6-phosphofructokinase	21	22	21	1226	131.2	419	CEL68875.1
60S ribosomal protein L5	10	13	10	311	35.3	417	CEL65161.1
HSP90, related	16	19	16	706	81.7	415	CEL68318.1
40S ribosomal protein S15	3	11	3	150	17.2	411	CEL65489.1
hypothetical protein NCLIV_025920	16	19	16	277	31.1	408	CBZ52803.1
60S ribosomal protein L6	11	12	11	193	21.4	401	CEL69974.1
rhoptry neck protein RON3	13	13	13	1962	222.7	393	CEL69139.1
tryptophanyl-tRNAsynthetase,related	16	17	16	607	67.8	389	XP_003881044.1
putative uridine phosphorylase	9	10	9	302	32.8	388	CBZ55045.1
putative P-type Ca(2+)-ATPase	19	22	19	1341	144.7	382	XP_003886335.1
putative microneme protein MIC1	11	13	11	460	49.1	382	XP_003881292.1
Asparaginyl-tRNA synthetase, related	12	15	12	542	60.4	379	CBZ53844.1
hypothetical protein BN1204_070280	16	19	13	472	54.2	371	CEL71385.1
60S acidic ribosomal protein P0	11	16	11	311	33.8	369	XP_003885784.1
Contig An13c0020, complete genome, related	10	13	10	463	51.7	362	CBZ55831.1
dense granule protein 7, putative	6	29	6	217	22.5	362	CEL66347.1
conserved hypothetical protein	10	18	10	356	39	361	XP_003884553.1
glutamyl-tRNA synthetase, putative	15	16	15	775	86	361	CEL66600.1
NTPase	12	15	12	626	68.6	360	CEL71174.1
26S proteasome regulatory subunit rpn1, related	13	14	13	1084	116.4	357	CBZ55246.1
conserved hypothetical protein	13	14	13	393	42.7	351	CBZ49545.1
eukaryotic translation initiation factor 3 subunit 10, putative	18	21	18	1059	120.7	350	CEL66494.1
glyceraldehyde 3-phosphate dehydrogenase, related	6	9	5	340	36.5	349	CBZ51119.1
SAG3 protein, related	11	15	7	370	39.5	344	CBZ53693.1
putative TCP-1/cpn60 family chaperonin	9	11	9	548	59.1	340	CBZ53279.1
putative lysine decarboxylase domain-containing protein	13	16	13	395	43.5	339	CBZ54634.1
60S acidic ribosomal protein P2, related	2	6	2	111	11.6	338	CBZ54967.1
30S ribosomal protein S12, related	5	10	5	143	15.8	337	CEL67248.1
60S ribosomal protein L13a	7	9	7	269	31.7	335	CEL68580.1
protein kinase	11	13	11	469	51.6	334	CEL66674.1
hypothetical protein NCLIV_061170	12	13	12	842	92.5	329	CBZ55693.1
40S ribosomal protein S2	11	30	11	268	29.2	326	CEL68652.1
rhoptry neck protein RON4	8	10	8	957	104.4	322	CEL67208.1
SRS domain-containing protein	6	9	6	351	38.1	322	XP_003885673.1
lysyl-tRNA synthetase, putative	12	15	12	657	74.2	321	CEL66174.1
SRS domain-containing protein	10	14	9	382	41	320	CBZ53653.1
hypothetical protein NCLIV_021080	10	14	10	260	28.2	318	CBZ52320.1
DnaJ domain containing protein, related	7	9	7	426	47.5	317	CEL69818.1
unnamed protein product	12	12	12	1479	165.1	314	CBZ56036.1
hypothetical protein NCLIV_049900	20	23	20	831	93	314	CBZ54561.1
GTP-binding nuclear protein Ran, related	9	12	9	216	24.6	313	CBZ56005.1
putative adenylyl cyclase associated protein, partial	8	10	8	223	24.7	312	XP_003885015.1
putative seryl-tRNA synthetase	13	15	13	480	53.6	312	XP_003886277.1
SRS domain-containing protein	9	9	9	325	33.6	311	CEL66550.1
hypothetical protein NCLIV_047660	11	13	11	477	51.7	308	CBZ54335.1
kelch motif domain-containing protein, putative	8	11	8	484	52.5	305	CEL65217.1
RecName: Full=Dense granule protein 2; AltName: Full=Antigen Nc14.1; AltName: Full=NcDG2	4	6	4	193	20.6	303	Q25540.2
60S ribosomal protein L17, related	8	14	8	195	22.3	299	CEL65085.1
MORN repeat-containing protein, putative	9	10	9	385	41.9	296	CEL64377.1
Phosphoglycerate kinase	7	8	7	418	44.6	287	CEL65271.1
thrombospondin type 1 domain-containing protein,putative	8	8	8	2885	314.6	286	CEL70693.1
hypothetical protein BN1204_027600	8	8	8	881	95.6	284	CEL66957.1
valyl-tRNAsynthetase, mitochondrial, related	13	13	13	1057	119.4	282	CBZ50299.1
40S ribosomal protein S8	9	17	9	205	23.4	279	CEL70590.1
conserved hypothetical protein	10	12	10	1222	131.9	279	XP_003886088.1
putative apical membrane antigen 1	11	11	11	569	63.3	278	XP_003883111.1
hypothetical protein NCLIV_039100	9	10	9	449	50	278	CBZ50835.1
Glucose transporter 1A, related	8	8	8	570	61.7	277	CEL69445.1
30S ribosomal protein S8P, related	9	13	9	171	19.4	275	XP_003884561.1
tubulin alpha chain	9	10	9	453	50.1	275	CBZ55466.1
unnamed protein product	8	8	5	355	38.8	274	XP_003884985.1
hypothetical protein NCLIV_024250	4	6	4	158	16.4	273	XP_003882669.1
hypothetical protein NCLIV_039940	8	8	8	395	44.5	270	CBZ50919.1
ROP 2, related	9	9	9	593	66.1	268	CEL70391.1
GG10762, related	7	7	7	363	38.8	267	CEL70978.1
Thioredoxin-dependent peroxide reductase,mitochondrial, related	6	9	6	200	22	267	XP_003885863.1
Ribosomal protein L18, related	8	9	8	187	21.1	265	CBZ56044.1
conserved hypothetical protein	6	7	6	501	53.9	264	XP_003883201.1
Uracil phosphoribosyltransferase	8	8	8	248	27.8	264	CEL69904.1
SRS domain-containing protein	8	8	8	459	49.4	261	CEL65146.1
Histone H4, related	4	8	4	103	11.4	259	CEL65759.1
putative acid phosphatase	6	6	6	436	46.9	256	XP_003885718.1
CAMP-dependent protein kinase regulatory subunit,putative	11	12	11	385	42.9	255	CEL65907.1
Proteasome/cyclosome repeat family protein,related	6	6	6	1177	127.6	255	CEL66675.1
dense granule protein GRA12	7	17	7	435	48.6	254	CEL68343.1
enolase 1	8	8	8	475	52	253	CEL67969.1
hypothetical protein NCLIV_039030	9	11	9	134	15.5	252	XP_003880861.1
hypothetical protein BN1204_030900	5	5	5	1275	139.7	250	CEL67289.1
protein phosphatase 2C, putative	5	6	5	571	61	249	CEL71199.1
hypothetical protein NCLIV_017500	9	15	9	192	21.6	247	CBZ51958.1
putative phosphatidylinositol-4-phosphate 5-kinase	8	9	8	477	50.9	246	XP_003885263.1
hypothetical protein NCLIV_010230	5	7	5	607	64.7	244	XP_003880587.1
conserved hypothetical protein	7	8	7	579	62.9	244	XP_003881938.1
putative transporter, major facilitator family domain containing protein	5	7	5	545	58.8	243	CBZ54815.1
opine dehydrogenase, putative	12	14	12	435	47.8	243	CEL68489.1
putative 26S protease regulatory subunit 6b	7	8	7	416	47	242	CBZ53278.1
60s ribosomal protein L10, related	6	12	6	221	24.7	242	CBZ51043.1
putative TCP-1/cpn60 family chaperonin	6	6	6	546	59.3	242	XP_003880210.1
Exportin-7-B, related	11	11	11	1153	129.8	240	CEL64696.1
Rhomboid-6, isoform A, related	8	9	8	646	70.1	238	XP_003884026.1
aldo/keto reductase family oxidoreductase,putative	6	6	6	589	64.2	236	CEL66542.1
ROP40long	4	4	4	525	57.9	235	ALT04898.1
methionine--tRNAligase, related	15	17	15	982	106.9	233	XP_003881123.1
srs domain-containing protein	6	9	0	404	42.3	233	CBZ50602.1
hypothetical protein NCLIV_048020	8	9	8	328	36	232	CBZ54372.1
hypothetical protein NCLIV_015410	7	10	7	166	18.5	231	XP_003881782.1
conserved hypothetical protein	3	4	3	330	36.3	231	CBZ51522.1
unnamed protein product	12	12	12	362	39	229	XP_003884639.1
CBR-IMB-2 protein, related	6	6	6	1026	112.9	229	CEL70283.1
hypothetical protein NCLIV_044270	8	8	8	723	79.2	229	CBZ51365.1
Alanyl-tRNA synthetase	7	7	7	1034	113.5	228	CEL70423.1
26S proteasome regulatory subunit S4 like AAA ATpase, related	9	12	8	409	46	227	CEL66818.1
putative Gbp1p protein	8	8	8	294	31.8	225	CBZ52736.1
hypothetical protein NCLIV_008730	3	4	3	165	17.8	223	XP_003880438.1
conserved hypothetical protein	5	5	5	251	28.1	220	CBZ54428.1
conserved hypothetical protein	7	10	7	306	35.2	220	XP_003880867.1
hypothetical protein NCLIV_012120	10	14	10	261	29.5	220	CBZ50745.1
AT3G15980 protein, related	12	14	12	1295	142	219	CEL65853.1
hypothetical protein NCLIV_015880	10	12	10	196	22.6	219	CBZ51796.1
unnamed protein product	4	4	4	318	34.9	218	XP_003886263.1
putative duplicated carbonic anhydrase	6	8	6	522	58.7	217	XP_003880177.1
hypothetical protein NCLIV_015160	7	8	7	190	21.4	217	CBZ51722.1
adp-ribosylation factor 4, related	6	6	6	183	21	215	XP_003880260.1
hypothetical protein NCLIV_034130	12	13	12	598	67.3	213	XP_003883658.1
hypothetical protein NCLIV_043180	5	5	5	795	87.9	211	XP_003881283.1
Elongation factor 1-beta, related	8	10	8	242	26.8	211	XP_003884254.1
centromere/microtubule binding protein, putative	10	10	10	503	56.4	210	CEL69434.1
60S ribosomal protein L32, related	5	6	5	134	15.7	210	CEL68104.1
Phosphoglucomutase 2, related	7	9	7	719	79.2	210	XP_003881684.1
3-ketoacyl-(Acyl-carrier-protein) reductase, related	6	6	6	376	38.9	209	XP_003885852.1
translation INITIATION FACTOR 3 SUBUNIT 9-like protein, related	7	7	7	759	88.7	209	CBZ50114.1
lsu ribosomal protein L19E, related	6	7	6	186	22.1	209	XP_003881136.1
hypothetical protein NCLIV_068380	5	7	4	489	53.4	208	XP_003886439.1
bradyzoite protein MAG1	5	5	5	456	49.4	207	BAI45246.1
hypothetical protein NCLIV_052380	6	7	6	135	15.1	206	XP_003884840.1
conserved hypothetical protein	5	6	5	955	100.5	206	CBZ52063.1
putative histidyl-tRNA synthetase	6	7	6	1129	121.5	205	CBZ52166.1
cDNA FLJ57348, highly similar to Homo sapiens hexokinase domain containing 1 (HKDC1), mRNA, related	6	7	6	468	51.5	204	XP_003880940.1
hypothetical protein NCLIV_004200	6	6	6	1734	191.6	203	XP_003879971.1
conserved hypothetical protein	3	3	3	249	25.2	202	XP_003880206.1
unnamed protein product	3	4	3	805	89.3	201	XP_003883572.1
hypothetical protein BN1204_065090	9	9	9	695	75.4	200	CEL70832.1
putative calmodulin	7	7	7	133	15.1	196	XP_003879675.1
putative 60S ribosomal protein L23	6	13	6	139	14.8	195	CBZ55146.1
50S ribosomal protein L21e, related	6	10	6	157	17.9	193	XP_003885895.1
SRS domain-containing protein	5	8	1	371	39.3	193	CBZ53692.1
hypothetical protein BN1204_060250	3	3	3	276	29.3	192	CEL70342.1
hypothetical protein NCLIV_007860	10	11	10	570	63.4	191	XP_003880346.1
proteasome subunit p58, related	4	5	4	554	61.5	190	CBZ51272.1
beta adaptin protein, putative	5	5	5	924	101.7	189	CEL65872.1
Bifunctional dihydrofolate reductase-thymidylate synthase, related	8	8	8	690	76.9	189	CEL70868.1
hypothetical protein NCLIV_034470	6	7	1	188	21.3	188	XP_003883697.1
60S ribosomal protein L10a	5	6	5	217	24.6	188	CEL69532.1
V-type ATP synthase beta chain, related	8	8	8	505	56.7	184	CEL70400.1
hypothetical protein BN1204_018120	5	5	5	723	78.5	184	CEL65983.1
conserved hypothetical protein	7	10	7	420	45.7	183	CBZ49542.1
conserved hypothetical protein	8	9	8	400	45.3	182	XP_003885565.1
Zgc:92083, related	5	5	5	846	93.9	181	XP_003885021.1
unnamed protein product	4	5	4	190	19.8	181	CAD43551.1
conserved hypothetical protein	3	4	3	331	35.1	181	CBZ52250.1
26s proteasome subunit p55, putative	4	5	4	487	55.2	179	CEL66809.1
transaldolase, putative	6	6	6	377	41.2	177	CEL67231.1
hypothetical protein NCLIV_031510	5	7	5	145	16.3	176	CBZ53364.1
hypothetical protein NCLIV_046040	7	9	7	161	18.6	176	CBZ54172.1
putative AGC kinase	5	6	5	343	39.4	176	CBZ54248.1
Pdcd4-prov protein, related	4	5	4	504	57.6	175	XP_003881630.1
50S ribosomal protein L30e, related	6	7	6	108	11.7	175	XP_003883467.1
ribosomal protein RPP1	4	5	4	118	12.2	174	CEL66868.1
LOC549444 protein, related	8	10	8	183	21.4	174	CEL66712.1
ATP synthase subunit beta, related	4	4	4	561	60	173	CBZ52779.1
40S ribosomal protein S12, related	6	8	6	142	15.4	172	CEL66217.1
30S ribosomal protein S10P, related	5	5	5	237	27.2	172	CEL64725.1
dynein heavy chain	8	8	8	4936	553.6	172	CEL64241.1
Novel protein (Zgc:77804), related	4	4	4	460	49.4	172	CEL65182.1
hypothetical protein NCLIV_045010	6	7	6	205	24.3	172	XP_003884098.1
conserved hypothetical protein	5	5	5	435	48.2	171	XP_003884821.1
srs domain-containing protein	3	3	3	397	41.4	171	CBZ49735.1
hypothetical protein NCLIV_024870	9	11	9	212	24	171	XP_003882730.1
VASA RNA helicase, related	7	7	7	769	81.8	170	XP_003884268.1
hypothetical protein BN1204_004730	5	5	5	521	56.9	170	CEL64586.1
hypothetical protein NCLIV_064440	6	6	6	188	21.7	167	XP_003886044.1
Fibrillarin superfamily, related	6	6	6	263	28.5	165	XP_003885136.1
conserved hypothetical protein	4	4	4	550	59.5	165	CBZ55625.1
hypothetical protein NCLIV_025160	7	8	7	146	16.8	164	XP_003882759.1
conserved hypothetical protein	3	3	3	1134	123.2	162	XP_003884516.1
putative coatomer gamma 2-subunit protein	4	5	4	1032	110.5	161	CBZ53640.1
putative TCP-1/cpn60 family chaperonin	6	6	6	557	59.3	160	CBZ51473.1
putative glyceraldehyde-3-phosphate dehydrogenase	6	7	5	1028	108.2	158	CBZ53937.1
hypothetical protein NCLIV_023520	2	2	2	696	73.9	156	XP_003882596.1
Leucyl-tRNA synthetase 2, related	6	6	6	1160	131	156	CBZ51492.1
30S ribosomal protein S15P/S13e, related	7	10	7	151	17.2	155	XP_003883878.1
gg11844, related	3	3	3	460	49.4	154	CBZ51198.1
30S ribosomal protein S9P, related	5	13	5	148	16.7	154	CEL66677.1
hypothetical protein NCLIV_033550	3	3	3	828	90.5	154	CBZ53568.1
prolyl-tRNA synthetase, putative	11	12	11	710	80.6	153	CEL70393.1
putative eukaryotic translation initiation factor 3 subunit 5	9	9	9	346	38.1	151	XP_003884122.1
putative MORN repeat-containing protein	7	7	7	457	48.5	150	CBZ51489.1
putative toxofilin, partial	3	5	3	291	32.3	149	XP_003884737.1
Ras-related protein ORAB-1	7	7	5	202	22.8	149	CEL69473.1
adenosine transporter, putative	6	6	6	465	51.3	147	CEL66073.1
Malate dehydrogenase (NAD) (Precursor), related	7	8	7	329	35.6	147	XP_003883478.1
Small nuclear ribonucleoprotein G	2	2	2	169	18.6	147	CEL70080.1
hypothetical protein NCLIV_053950	6	8	6	175	20.2	146	CBZ54968.1
eukaryotic translation initiation factor 3 subunit 11	5	5	5	271	29.9	146	CBZ52770.1
Peptidyl-prolyl cis-trans isomerase A, related	4	4	4	172	18.8	145	XP_003882240.1
unnamed protein product	4	4	4	488	52	144	XP_003883028.1
conserved hypothetical protein	3	4	3	377	42.8	144	CBZ55141.1
unnamed protein product	5	8	5	130	13.6	144	CBZ51621.1
N-terminal acetyltransferase complex subunit NARG1, putative	5	5	5	967	109.4	143	CEL69158.1
hypothetical protein NCLIV_033690	3	3	3	756	80.4	142	XP_003883614.1
hypothetical protein NCLIV_061070	5	5	5	393	44.2	142	XP_003885709.1
citrate synthase, putative	5	5	5	641	72.5	140	CEL66667.1
eukaryotic translation initiation factor 3 subunit G-2, related	2	2	2	1870	205.6	140	XP_003879704.1
GA19392, related	6	6	6	582	65.1	139	CEL67357.1
60S ribosomal protein L35a	5	6	5	112	12.9	139	CEL70874.1
60S ribosomal protein L7-3	7	13	7	258	30.1	137	CEL70082.1
conserved hypothetical protein	2	2	2	366	38.7	137	XP_003881794.1
conserved hypothetical protein	5	5	5	811	88.9	137	XP_003880311.1
unnamed protein product	4	7	4	207	22.7	137	XP_003884186.1
hypothetical protein NCLIV_004920	6	6	6	248	27.3	136	CBZ50016.1
nuclear cap binding protein, putative	3	3	3	1248	138	136	CEL70907.1
protein disulfide isomerase precursor	8	8	8	471	52.9	135	AAV34741.1
MAC/Perforin domain-containing protein	2	2	2	1074	115.5	135	CEL66281.1
hypothetical protein NCLIV_032770	5	5	5	909	101.2	134	CBZ53490.1
hypothetical protein NCLIV_069110	4	4	1	349	38.1	134	CCA30040.1
ubiquitin-activating enzyme E1, related	6	6	6	1100	121.1	134	CBZ51183.1
conserved hypothetical protein	2	2	2	2277	238.3	132	CBZ54409.1
adaptin N terminal region family protein,related	5	5	5	1117	123.2	132	XP_003880866.1
40S ribosomal protein S10b, related	4	5	4	151	17.3	132	CEL64838.1
histone H2B, related	5	6	4	116	12.6	131	CBZ49613.1
Thermosome subunit, related	5	5	5	539	58.8	131	XP_003882499.1
hypothetical protein NCLIV_050680	6	6	6	578	63.1	129	CBZ54640.1
SRS domain-containing protein	2	3	2	300	31.3	129	CBZ51795.1
Histone H2A, related	2	4	0	126	13.4	128	XP_003882857.1
50S ribosomal protein L24P, related	6	6	6	141	16.3	127	CEL70756.1
agap001651-PA, related	4	4	4	521	55.9	127	XP_003879815.1
Aspartyl-tRNA synthetase, cytoplasmic	5	6	5	768	85	126	CEL66426.1
probable 26S protease regulatory subunit 6B,related	8	9	7	443	49.4	126	XP_003880859.1
histone H2B, related	5	6	4	123	13.7	124	XP_003879967.1
hypothetical protein NCLIV_027480	3	3	3	395	44.8	124	XP_003882991.1
hypothetical protein BN1204_001660	3	3	3	334	35.5	123	CEL64262.1
vacuolar ATP synthase catalytic subunit A,putative	8	9	8	616	68	123	CEL67201.1
putative transmembrane domain-containing protein	3	3	3	755	76.1	122	XP_003880034.1
unnamed protein product	3	6	3	211	22.4	122	CAD43547.1
Lipase maturation factor 2, related	4	4	4	969	110.7	121	CEL70108.1
hypothetical protein NCLIV_019830	5	7	5	262	29.2	120	XP_003882226.1
conserved hypothetical protein	3	3	3	307	33.7	120	CBZ54962.1
putative ATP-dependent helicase, putaive	4	4	4	395	45.1	119	XP_003881760.1
conserved hypothetical protein	7	7	7	950	102.8	117	XP_003881132.1
conserved hypothetical protein	2	3	2	196	22.4	117	XP_003880238.1
Trichohyalin, putative	2	4	2	1635	178.2	117	CEL69024.1
putative 40S ribosomal protein S18	7	7	7	156	17.8	117	CBZ54332.1
Serine hydroxymethyltransferase, related	4	4	4	596	65.3	117	CEL69224.1
conserved hypothetical protein	6	7	6	499	53.6	116	XP_003884300.1
Probable 26S proteasome non-ATPase regulatory subunit 7	4	4	4	344	38.5	116	CEL67931.1
putative Ras family domain-containing protein	4	4	1	217	23.8	115	CBZ53035.1
adenosine transporter, putative	4	4	4	541	58.6	114	CEL67494.1
hypothetical protein NCLIV_049710	5	5	5	1299	140.8	113	XP_003884572.1
putative myosin light chain TgMLC1	2	2	2	216	24.7	113	CBZ53155.1
hypothetical protein NCLIV_066370	1	1	1	402	43.7	112	XP_003886237.1
Eukaryotic translation initiation factor 3 subunit 7-like protein, related	2	3	2	611	68.9	111	CEL65361.1
putative dense-granule antigen DG32	3	3	3	244	27.6	110	CBZ50080.1
L24, related	4	4	4	154	17.5	110	XP_003882132.1
Serine--pyruvate transaminase,related	4	4	4	381	41.7	109	CBZ51823.1
6-phosphogluconate dehydrogenase, decarboxylating, related	2	2	2	505	54.6	109	CEL70377.1
GM04207p, related	2	2	2	721	81.2	108	CBZ51525.1
Histone H2A, related	2	3	1	155	15.9	108	CEL70774.1
Virulent strain associated lipoprotein, related	4	4	4	2597	264.6	108	CEL68290.1
microneme protein MIC4, putative	2	2	2	595	64.4	107	CEL64395.1
conserved hypothetical protein	2	2	2	2723	295.8	107	CBZ55190.1
hypothetical protein BN1204_008030	4	5	4	231	25.2	105	CEL64936.1
rhoptry neck protein RON10	2	2	2	854	92.9	105	CEL66767.1
hypothetical protein NCLIV_020180	4	5	4	490	54.3	105	XP_003882264.1
GH18750, related	3	4	3	465	50.4	105	CEL69316.1
AP-1 complex subunit gamma	3	3	3	1007	106.5	105	CEL70001.1
hypothetical protein BN1204_052900	2	2	2	319	34.3	105	CEL69585.1
hypothetical protein NCLIV_044440	3	3	3	430	48	105	XP_003881415.1
MIC2-associated protein precursor	2	2	2	243	25	105	AAK74070.1
hypothetical protein NCLIV_064950	3	3	3	505	54.9	105	CBZ56069.1
Nucleoside diphosphate kinase, related	2	3	2	155	17.6	105	CEL64337.1
vacuolar ATP synthase subunit h, putative	3	3	3	481	53.8	104	CEL64425.1
hypothetical protein BN1204_004060	1	1	1	337	36.1	103	CEL64509.1
hypothetical protein NCLIV_048330	2	2	2	348	39.4	103	XP_003884434.1
RNase L inhibitor, related	4	4	4	613	69.1	103	CEL70264.1
putative 3', 5'-cyclic nucleotide phosphodiesterase domain-containing protein	1	2	1	2231	244.5	103	XP_003879543.1
putative ubiquitin	4	4	4	215	24.1	102	CBZ56016.1
TCP-1/cpn60 family chaperonin, putative	3	3	3	569	61.7	102	CEL66011.1
putative proteasome activator subunit	3	3	3	267	30.5	100	CBZ56257.1
hypothetical protein BN1204_033860	2	2	2	335	36.3	100	CEL67589.1
putative 26S proteasome non-ATPase regulatory subunit	5	6	5	413	47	99	CBZ51763.1
60S ribosomal protein L36, related	3	3	3	101	11.5	99	CEL65727.1
putative coatomer delta subunit	2	2	2	634	68.3	99	CBZ50029.1
Rhoptry kinase family protein, truncated (incomplete catalytic triad), putative	2	2	2	378	42.1	98	CEL64908.1
Ubiquitin-conjugating enzyme, related	1	1	1	140	15.6	98	CEL69711.1
Zinc finger DHHC domain containing 12, related	5	6	5	422	46.3	97	CEL70888.1
4'-phosphopantetheinyl transferase, putative	1	1	1	450	49.5	97	CEL69451.1
hypothetical protein NCLIV_051530	3	3	3	258	27.8	97	CBZ54726.1
probable cytosol aminopeptidase, related	2	2	2	564	59.7	96	CBZ51199.1
conserved hypothetical protein	1	1	1	285	29.1	96	XP_003880740.1
GMP synthase [glutamine-hydrolyzing]	3	3	3	566	61.9	96	CEL67296.1
microneme protein NcMIC11 precursor	4	5	4	203	22.1	95	AAN16380.1
hypothetical protein BN1204_069590	4	4	4	557	62.6	95	CEL71302.1
hypothetical protein NCLIV_062730	4	5	4	331	36.4	95	CBZ55847.1
hypothetical protein NCLIV_054750	5	7	5	306	35	95	XP_003885078.1
hypothetical protein NCLIV_026340	1	1	1	177	19.5	94	CBZ52845.1
Splicing factor U2af small subunit B	2	2	2	254	29.4	94	CEL69370.1
Ribosomal protein L37a, related	3	3	3	96	10.5	94	CEL70775.1
U2 small nuclear ribonucleoprotein, putative	3	3	3	257	29	93	CEL67217.1
methionine aminopeptidase,related	4	4	4	404	43.7	93	CBZ50765.1
putative TCP-1/cpn60 family chaperonin	6	6	6	542	58.5	93	CBZ53671.1
conserved hypothetical protein	1	1	1	189	20.9	91	XP_003884681.1
Probable protein phosphatase 2C 2	3	4	3	408	45.1	90	CEL66498.1
60S ribosomal protein Ll28B 27a, related	3	3	3	147	16.3	89	CBZ55032.1
ADP/ATP translocase	1	1	1	316	34.9	89	CEL70934.1
GTP binding protein, putative	4	4	4	396	44.6	89	CEL69448.1
multitransmembrane protein with signal peptide and GMGPP repeat at C-terminus, related	2	3	2	376	40.1	89	CBZ50896.1
putative vacuolar ATP synthase subunit c	3	3	3	409	46.7	89	XP_003885436.1
hypothetical protein BN1204_015060	1	1	1	1598	174	88	CEL65664.1
Trehalose-6-phosphate synthase of likely plant origin, related	1	1	1	1215	135.3	88	CEL64788.1
GE25707, related	4	4	3	219	25	86	CEL68426.1
yml024wp-like protein, related	4	4	4	132	15.2	86	XP_003879825.1
Tyrosyl-tRNA synthetase	5	5	5	430	48.3	86	CEL71029.1
Glucose-6-phosphate 1-dehydrogenase, related	2	2	1	863	96.3	85	CEL71056.1
Small COPII coat GTPase SAR1	3	4	3	192	22.1	85	CEL69498.1
putative peroxidoxin 2	2	2	2	224	24.5	84	XP_003884965.1
gk17769, related	1	1	1	619	67.1	84	CBZ50461.1
transcription elongation factor FACT 140 kDa,putative	1	1	1	816	92.8	84	CEL64633.1
unnamed protein product	2	2	2	64	7.5	84	CBZ56350.1
GJ17676, related	3	3	3	431	45.8	83	CEL67044.1
SRS domain-containing protein	4	5	4	352	37.9	82	CEL71222.1
Glucose-6-phosphate isomerase, related	2	2	2	507	56.6	82	CEL67078.1
hypothetical protein NCLIV_069360	1	1	1	325	34.6	82	CCA30164.1
Small nuclear ribonucleoprotein Sm D2	4	4	4	170	19.6	82	CEL67808.1
Tgd057, related	4	4	4	193	22.6	81	CEL70333.1
conserved hypothetical protein	2	2	2	386	43.1	80	CBZ56171.1
Polyribonucleotide nucleotidyltransferase	1	1	1	338	38.9	80	CEL70903.1
conserved hypothetical protein	2	2	2	671	73.4	79	XP_003880433.1
Translation initiation factor IF-2 beta subunit,related	2	2	2	232	26.3	79	CEL69279.1
putative PBS lyase HEAT-like repeat domain-containing protein	1	1	1	455	49.2	79	XP_003881220.1
unnamed protein product	2	2	2	294	30.3	78	XP_003880463.1
GAP70	4	4	4	313	36.6	78	CEL67486.1
putative reticulon domain-containing protein	2	2	2	197	21.9	78	CBZ54221.1
1,4-alpha-glucan branching enzyme, putative	1	1	1	970	109.4	77	CEL70211.1
splicing factor 3B subunit 1, putative	3	3	3	1392	151.5	77	CEL66246.1
hypothetical protein BN1204_059565	1	1	1	181	20.3	77	CEL70271.1
sushi domain-containing protein / SCR repeat-containing protein, putative	1	2	1	1133	123.7	76	CEL69708.1
Ribosomal protein L22, related	2	3	2	181	20.3	76	CBZ51846.1
Histone H2A, related	2	3	1	135	14.4	75	XP_003882834.1
Ubiquitin carboxyl-terminal hydrolase isozyme L5	1	1	1	408	45.2	75	CEL70696.1
conserved hypothetical protein	1	1	1	783	82	75	XP_003882401.1
putative EGF-like domain-containing protein	1	1	1	1161	124.2	75	XP_003879680.1
ctr copper transporter domain-containing protein,putative	3	3	3	508	53.6	75	CEL66706.1
serine/threonine protein phosphatase, put ative	6	6	6	1834	210.5	75	CEL68792.1
hypothetical protein NCLIV_038390	1	1	1	112	12.2	74	CBZ50764.1
conserved hypothetical protein	2	2	2	747	81.5	74	CBZ56012.1
conserved hypothetical protein	1	1	1	311	34.3	73	CBZ56124.1
hypothetical protein NCLIV_042070	8	8	8	332	37.4	73	XP_003881165.1
Succinate dehydrogenase flavoprotein subunit,related	2	2	2	420	45	72	CCA30020.1
hypothetical protein BN1204_047530	1	1	1	688	75.8	72	CEL69027.1
hypothetical protein NCLIV_014540	1	1	1	461	48.8	72	CBZ51660.1
hypothetical protein NCLIV_059450	3	4	3	434	49.1	71	XP_003885548.1
Possible RNA-binding protein, related	3	3	3	1224	129.5	70	CEL64255.1
Translation initiation factor 2 subunit alpha (AeIF-2a), related	3	3	3	352	39.5	70	CBZ55231.1
unnamed protein product	4	4	4	581	63.3	70	CBZ53028.1
60S ribosomal protein L38, related	3	3	3	84	9.5	70	CBZ53357.1
conserved hypothetical protein	3	3	3	309	33.6	69	XP_003886191.1
conserved hypothetical protein	2	2	2	384	43.4	69	CBZ49905.1
Thioredoxin h, related	2	2	2	106	12	69	CEL64170.1
PUB domain-containing protein	1	1	1	653	71.1	69	CEL64455.1
DEHA2F06798p, related	4	4	4	454	49.9	68	CEL70997.1
putative ctr copper transporter domain-containing protein	1	1	1	239	26.2	68	XP_003886141.1
SRS domain-containing protein	1	1	1	373	39.3	68	CEL71236.1
hypothetical protein NCLIV_048030	5	6	5	120	14.3	68	CBZ54373.1
Phosphoenolpyruvate carboxykinase (ATP), related	2	2	2	582	64.2	68	CEL68423.1
hypothetical protein BN1204_051725	2	2	2	102	11.6	67	CEL69463.1
conserved hypothetical protein	2	2	2	334	36.8	67	XP_003881234.1
putative long chain acyl-CoA synthetase	3	3	3	828	90.7	67	CBZ55971.1
superoxide dismutase	2	2	2	201	22.6	67	CEL70195.1
cAMP phosphodiesterase, putative	3	3	3	1303	145.1	67	CEL69062.1
hypothetical protein NCLIV_045220	5	5	4	398	44.5	67	CBZ54089.1
Protein SEY1 homolog	2	2	2	884	97.7	67	CEL70095.1
hypothetical protein NCLIV_064580	5	6	5	392	43.9	66	CBZ56032.1
hypothetical protein NCLIV_052370	1	1	1	391	41.6	66	CBZ54811.1
SRS domain-containing protein	3	5	2	375	40	66	CEL67649.1
putative actin	4	5	4	388	42.9	66	CBZ56052.1
putative mago nashi protein	1	1	1	150	17.7	66	CBZ50801.1
SnoRNP protein GAR1, putative	2	2	2	212	21.1	65	CEL67721.1
arginyl-tRNAsynthetase, related	3	3	3	594	66.8	65	CBZ50723.1
unnamed protein product	1	1	1	584	64.9	65	CBZ53805.1
casein kinase II beta chain, putative	1	1	1	365	39.9	65	CEL67699.1
putative serine/threonine protein phosphatase	2	2	2	692	75.3	65	XP_003880216.1
Vacuolar protein sorting-associated protein 35	3	3	3	840	94.8	65	CEL65937.1
Serine/threonine-protein kinase, putative	2	3	2	601	66.6	64	CEL67354.1
Elicitor-responsive protein, putative	2	2	2	240	25.9	63	CEL66391.1
putative 46 kDa FK506-binding nuclear protein	2	2	2	314	34.3	63	CBZ52871.1
conserved hypothetical protein	1	1	1	156	17.3	63	XP_003881628.1
Histone H3.3, related	2	2	2	136	15.4	63	CEL70515.1
hypothetical protein NCLIV_007180	1	1	1	91	10.8	63	CBZ50244.1
hypothetical protein NCLIV_035540	1	1	1	566	62.1	63	XP_003883805.1
hypothetical protein BN1204_060805	1	1	1	150	16.7	63	CEL70398.1
gl18351, related	3	3	3	536	58.7	63	CBZ50646.1
Prolyl oligopeptidase (Precursor),related	1	1	1	733	83	63	CBZ51639.1
T-complex protein 1 subunit gamma	4	4	4	556	60.8	62	CEL66207.1
cytidine deaminase, putative	1	1	1	436	46.1	62	CEL65791.1
hypothetical protein NCLIV_004580	1	1	1	3520	374.2	62	CBZ49981.1
conserved hypothetical protein	1	1	1	983	104.5	61	CBZ56051.1
hypothetical protein BN1204_065295	2	2	2	343	36.9	61	CEL70858.1
60S ribosomal protein L28	2	2	2	129	14.5	60	CEL67220.1
sm protein, related	1	2	1	121	13.6	60	XP_003880841.1
endonuclease/exonuclease/phosphatase domain-containing protein, putative	1	1	1	542	59.3	60	CEL70838.1
putative U4/U6 small nuclear ribonucleoprotein	1	1	1	717	78.7	60	XP_003882068.1
lanthionine synthetase C family protein	2	2	2	424	46.3	60	CEL65504.1
Small nuclear ribonucleoprotein S	1	1	1	132	14.4	60	CEL69682.1
WD-40 repeat protein, related	1	1	1	560	60.7	60	XP_003882546.1
leucine rich repeat-containing protein	2	2	2	1862	208.3	60	CEL64702.1
hypothetical protein NCLIV_001890	1	1	1	975	104.7	60	CBZ49701.1
Translation initiation factor 1A (AeIF-1A),related	3	3	3	161	18.1	58	XP_003882756.1
unnamed protein product	2	2	2	406	45.3	58	XP_003885188.1
RNA helicase-related protein required for pre-mRNA splicing, related	2	2	2	2230	250.8	58	XP_003884506.1
transcription elongation factor SPT6	1	1	1	3325	368.1	57	CEL69631.1
putative major facilitator superfamily domain-containing protein	1	1	1	592	64.3	57	CBZ50667.1
putative profilin family protein	1	1	1	163	17.6	57	CBZ49563.1
unnamed protein product	2	2	2	400	41.5	57	XP_003886358.1
U1 small nuclear ribonucleoprotein 70 kDa	2	2	2	274	32.1	56	CEL66229.1
Proteophosphoglycan ppg4, related	1	2	1	4183	437.3	55	XP_003884416.1
hypothetical protein NCLIV_066870	2	2	2	161	17.5	55	XP_003886287.1
conserved hypothetical protein	1	1	1	349	37	55	CBZ51760.1
putative microneme protein MIC6	2	3	2	327	34.1	54	XP_003885777.1
hypothetical protein BN1204_024110	2	2	2	222	24.4	54	CEL66602.1
unnamed protein product	1	1	1	237	25.8	54	XP_003882354.1
putative importin	1	1	1	1199	130.5	53	XP_003883420.1
hypothetical protein NCLIV_060380	1	1	1	415	46.2	53	CBZ55613.1
Ribosomal protein S27, related	1	1	1	82	9.1	53	CEL70551.1
regulator of chromosome condensation, putative	1	1	1	1180	123.1	53	CEL65522.1
conserved hypothetical protein	1	2	1	691	76.6	53	XP_003884528.1
Small seven transmembrane domain-containing protein, putative	1	1	1	255	27.6	53	CEL68938.1
hypothetical protein NCLIV_043880	1	1	1	238	27	53	CBZ51324.1
Protein transport protein Sec24-like	1	1	1	1018	107.9	53	CEL71193.1
DEAH-box RNA/DNA helicase, putative	2	2	2	2293	243.1	52	CEL65255.1
hypothetical protein BN1204_021365	1	1	1	477	53.9	52	CEL66318.1
putative actin	3	4	3	416	46.4	52	XP_003885722.1
hypothetical protein NCLIV_012510	3	3	3	118	12.9	52	XP_003881486.1
transketolase, related	1	1	1	986	108.2	52	XP_003880687.1
CRAL/TRIO domain-containing protein	2	2	2	433	48.7	51	CEL70640.1
putative sec1 family domain-containing protein	1	1	1	1035	108.7	51	XP_003879731.1
TSP1 domain-containing protein TSP12 (Precursor),related	1	1	1	1391	151.1	50	CEL68060.1
Os03g0795800 protein, related	1	1	1	265	29	50	CEL69676.1
Protein kinase AKT, related	1	1	1	130	15.1	50	CEL66860.1
armadillo/beta-catenin-like repeat-containing protein	1	1	1	274	30.5	50	CBZ52818.1
unnamed protein product	2	2	2	592	65.3	49	CBZ51379.1
hypothetical protein BN1204_050915	2	2	2	268	29.6	49	CEL69381.1
Pyruvate kinase, related	1	1	1	531	57.6	49	CBZ51726.1
Succinate dehydrogenase [ubiquinone] flavoprotein subunit, mitochondrial	2	2	2	355	39.2	49	CEL69543.1
hypothetical protein NCLIV_043020	1	1	1	5407	577.5	49	XP_003881268.1
conserved hypothetical protein	2	2	2	2073	217.2	49	CBZ51372.1
Exportin-1	4	4	4	1117	128.2	49	CEL70899.1
putative 26S proteasome non-ATPase regulatory subunit 4	1	1	1	402	41.9	49	CBZ54426.1
Os06g0732000 protein, related	2	2	2	123	14.2	49	CEL70972.1
ubiquitin / ribosomal protein CEP52 fusion protein, putative	3	3	3	129	14.7	48	CEL68433.1
choline kinase, putative	1	1	1	613	68	48	CEL65105.1
hypothetical protein BN1204_019820	1	1	1	295	32.2	48	CEL66161.1
GD24343, related	2	2	2	449	48.2	48	CBZ52788.1
CBR-CSN-5 protein, related	4	4	4	314	35.2	47	XP_003883922.1
hypothetical protein BN1204_012660	1	1	1	756	82.3	47	CEL65418.1
putative Splicing factor 3B subunit 3	3	3	3	1233	135.8	47	XP_003883379.1
tRNA binding domain containing protein, related	1	1	1	465	49.9	47	CEL64734.1
hypothetical protein BN1204_037370	1	2	1	185	20	47	CEL67956.1
hypothetical protein BN1204_049920	1	1	1	914	100.8	47	CEL69277.1
Ribosomal protein S26E, related	2	2	2	113	12.8	47	XP_003882071.1
hypothetical protein BN1204_057330	1	1	1	215	24.4	47	CEL70042.1
putative isoleucine-tRNAsynthetase	2	2	2	1100	126	47	CBZ49773.1
putative IMPortin-alpha re-exporter	5	5	5	1054	114.9	46	XP_003880372.1
hypothetical protein BN1204_011925	1	1	1	113	12.8	46	CEL65337.1
conserved hypothetical protein	1	1	1	213	22.9	46	CBZ54182.1
GH22120, related	1	1	1	4170	428.2	46	CBZ54558.1
ribosomal protein L41, putative	1	1	1	105	12.1	45	CEL66320.1
hypothetical protein NCLIV_033850	3	3	3	1613	180.9	45	CBZ53598.1
hypothetical protein BN1204_047600	1	1	1	918	98.7	45	CEL69034.1
hypothetical protein BN1204_031000	1	1	1	85	9.4	45	CEL67299.1
SnoRNA binding domain, related	2	2	2	1782	189	45	XP_003882112.1
conserved hypothetical protein	1	2	1	805	86.6	45	XP_003885888.1
hypothetical protein NCLIV_058360	1	3	1	299	34.4	45	CBZ55413.1
Sec1 family protein	1	1	1	671	72.1	45	CEL65478.1
putative peptidase M16 domain containing protein	1	1	1	2231	236.5	45	XP_003881392.1
Nuclear protein localization protein 4	2	2	2	504	56.3	45	CEL67758.1
TGF beta receptor associated protein-like protein, related	1	1	1	1172	128.3	44	XP_003885427.1
CRAL/TRIO domain-containing protein	3	3	3	436	48.2	44	CEL66338.1
hypothetical protein BN1204_051410	1	1	1	1017	111.7	43	CEL69430.1
hypothetical protein NCLIV_058340	1	1	1	783	84.5	43	XP_003885439.1
transporter, major facilitator family protein	1	1	1	1297	137.1	43	CEL64943.1
hypothetical protein, conserved	3	3	3	2995	327.7	43	CCA30110.1
pre-mRNA-splicing factor ATP-dependent RNA helicase, putative	1	1	1	1205	135.7	43	CEL69887.1
Isocitrate dehydrogenase-like protein, related	1	1	1	605	68.1	43	CEL68155.1
60S ribosomal protein L34	3	3	3	134	15.4	43	CEL68834.1
Forkhead-associated domain-containing protein, related	1	1	1	1155	120	43	CEL68293.1
hypothetical protein NCLIV_020840	1	1	1	568	61.5	42	XP_003882329.1
Phosphatidylserine decarboxylase, related	3	3	3	542	59.5	42	CEL66235.1
CAM kinase, CDPK family CAM kinase TgTPK5,putative	1	1	1	666	75.5	42	CEL70554.1
putative DNA-directed RNA polymerase I largest subunit	1	1	1	2799	305.9	42	CBZ52145.1
TB2/DP1, HVA22 domain-containing protein,putative	1	1	1	168	19.2	42	CEL65283.1
Peptidase M16 domain protein, related	1	1	1	1114	125.3	42	CEL66077.1
hypothetical protein BN1204_063250	2	2	2	266	29.4	42	CEL70642.1
putative rhomboid-like protease 5	1	1	1	937	101.6	42	XP_003879705.1
conserved hypothetical protein	2	2	2	168	17.6	41	CBZ53066.1
hypothetical protein BN1204_062460	1	1	1	2039	220.9	41	CEL70562.1
hypothetical protein NCLIV_061600	1	1	1	469	51	41	CBZ55735.1
putative translational activator	5	5	5	3415	360.9	41	XP_003883418.1
Inosine-5'-monophosphate dehydrogenase	2	3	2	577	61.3	41	CEL67492.1
Abhydrolase domain-containing protein FAM108C1	1	1	1	452	49.5	40	CEL69179.1
Isocitrate dehydrogenase, cytoplasmic	1	1	1	540	59	39	CEL69951.1
Novel protein (Zgc:66430), related	1	1	1	279	31.8	39	CEL68340.1
hypothetical protein NCLIV_060400	1	1	1	169	17.9	39	XP_003885643.1
Casein kinase one (CK1) TgCK1b, putative	2	2	2	433	49	39	CEL68400.1
hypothetical protein BN1204_014560	1	1	1	3299	353.5	39	CEL65616.1
14 kDa phosphohistidine phosphatase, putative	1	1	1	389	42.1	38	CEL64716.1
H/ACA ribonucleoprotein complex subunit 2-like protein, related	1	1	1	131	14.2	38	CBZ54635.1
proteasome PCI domain-containing protein,putative	1	1	1	524	57.3	37	CEL68810.1
phosphoglycerate mutase, related	1	2	1	252	28.4	37	XP_003880176.1
hypothetical protein BN1204_068850	2	2	2	557	62.7	36	CEL71218.1
alternative splicing type 3 and, putative	1	1	1	593	69.6	36	CEL65331.1
hypothetical protein BN1204_007990	1	1	1	316	36	36	CEL64932.1
putative WD domain-containing protein	1	1	1	3177	338.2	36	XP_003881557.1
hypothetical protein NCLIV_065010	1	1	1	210	23.4	36	XP_003886101.1
malate dehydrogenase, related	1	1	1	316	33.7	36	CBZ50644.1
putative sec23/Sec24 helical domain-containing protein	2	2	2	1517	162.4	35	CBZ54213.1
serine-threonine phosophatase 2C, putative	3	3	3	331	36.7	35	CEL67386.1
conserved hypothetical protein	1	1	1	510	55.5	35	XP_003883391.1
hypothetical protein NCLIV_001135	2	2	2	609	65.3	35	XP_003879656.1
conserved hypothetical protein	1	1	1	4027	453.4	35	CBZ53587.1
srs domain-containing protein	1	1	1	386	40.8	34	CBZ50817.1
Glutathione peroxidase, related	1	1	1	332	37.3	34	CEL69084.1
hypothetical protein BN1204_007540	1	1	1	3342	356.6	34	CEL64885.1
ATPase, related	1	1	1	1153	127.4	33	XP_003882467.1
DNA replication licensing factor, putative	1	1	1	867	97.2	33	CEL69398.1
Predicted hydrolases or acyltransferases,related	1	1	1	320	34.4	33	CEL68066.1
conserved hypothetical protein	1	1	1	191	22	33	CBZ50716.1
hypothetical protein BN1204_065660	1	1	1	2379	253.4	33	CEL70896.1
CUG-BP-and ETR-3-like factor 3, related	1	1	1	678	69.2	33	CBZ54017.1
hypothetical protein BN1204_056300	1	1	1	490	55.6	33	CEL69933.1
conserved hypothetical protein	1	1	1	751	77	32	XP_003882895.1
conserved hypothetical protein	1	1	1	269	30.8	32	CBZ54677.1
coronin, putative	1	1	1	624	68.9	32	CEL70247.1
DNA replication licensing factor, putative	1	1	1	1019	112.7	32	CEL70409.1
hypothetical protein NCLIV_002120	1	1	1	8243	859.3	32	XP_003879760.1
putative ATP-dependent RNA helicase DDX family protein	1	1	1	762	82.1	32	CBZ49763.1
U6 snRNA-associated Sm-like protein LSm6	1	1	1	87	10.1	32	CEL65495.1
CMGC kinase, CDK family TgPK2, putative	1	1	1	300	34.3	31	CEL70519.1
hypothetical protein BN1204_059525	1	1	1	167	18.8	31	CEL70266.1
upf0027 protein PH1602, related	1	1	1	519	56.3	30	CBZ49765.1
hypothetical protein BN1204_023780	1	1	1	593	63.7	30	CEL66567.1
Beige/BEACH domain-containing protein	1	1	1	1937	206.5	30	CEL66681.1
hypothetical protein BN1204_020700	1	1	1	960	104	30	CEL66251.1
60S ribosomal protein L7a, putative	1	1	1	177	19.5	30	CEL69990.1
hypothetical protein NCLIV_015990	3	3	3	97	11.1	30	CBZ51807.1
importin beta-3 subunit, putative	1	1	1	1236	135.9	29	CEL67215.1
AGAP011504-PA, related	1	1	1	99	10.3	29	CEL65326.1
YALI0D21604p, related	2	2	2	986	109.4	29	CEL67870.1
conserved hypothetical protein	1	1	1	2579	285.3	29	XP_003884890.1
la domain-containing protein, putative	2	2	2	559	61.4	29	CEL67959.1
conserved hypothetical protein	3	3	3	1530	165.6	29	CBZ54545.1
Catalase (EC 1.11.1.6), related	1	1	1	516	58.7	29	CBZ53437.1
conserved hypothetical protein	3	3	3	275	29.7	29	XP_003883097.1
hypothetical protein BN1204_060220	1	1	1	2981	320	28	CEL70339.1
hypothetical protein BN1204_013240	1	2	1	809	84	28	CEL65481.1
hypothetical protein BN1204_000570	1	1	1	852	94.2	28	CEL64138.1
putative P-type ATPase	1	1	1	2508	273.2	28	CBZ55853.1
Wd repeat protein, putative	1	1	1	537	59.1	27	CEL69865.1
YB95_ARATH Uncharacterized protein At2g3	2	2	2	289	32	27	CEL69475.1
hypothetical protein NCLIV_004400	1	1	1	475	50.7	26	XP_003879991.1
hypothetical protein NCLIV_047810	1	1	1	257	28.6	25	XP_003884381.1
hypothetical protein NCLIV_014750	1	1	1	1630	175.4	25	XP_003881714.1
vacuolar protein sorting 29, putative	1	1	1	203	22.4	25	CEL66413.1
putative thioredoxin	1	1	1	250	27.3	24	XP_003885986.1
Formate/nitrite transporter family protein,related	1	1	1	421	44.9	23	CEL64508.1
splicing factor 3a protein, putative	1	1	1	554	64.5	23	CEL64654.1
Eukaryotic initiation factor, related	1	1	1	487	54.4	23	CBZ55212.1
conserved hypothetical protein	1	1	1	615	66.5	23	XP_003883445.1
hypothetical protein BN1204_002495	1	1	1	170	19.5	21	CEL64347.1
DNA excision repair protein, putative	1	1	1	1606	177.2	21	CEL66666.1
tRNA (adenine-N(1)-)-methyltransferase catalytic subunit, putative	1	1	1	575	60.9	14	CEL68740.1
conserved hypothetical protein	1	1	1	146	16.3	0	CBZ55573.1
hypothetical protein NCLIV_055820	1	1	1	1641	184	0	XP_003885185.1
hypothetical protein BN1204_052960	1	1	1	1240	132.1	0	CEL69593.1
DEAD/DEAH box helicase, putative	1	1	1	602	65.2	0	CEL64576.1
putative RNA methyltransferase, TrmH family domain-containing protein	1	1	1	2918	308.9	0	CBZ55745.1
microneme protein 8, putative	1	1	1	682	73.8	0	CEL70595.1
hypothetical protein NCLIV_029860	1	1	1	194	20.6	0	XP_003883230.1
Peptidylprolyl isomerase D (Cyclophilin D),related	1	1	1	529	58.3	0	XP_003883131.1
hypothetical protein BN1204_045980	1	1	1	170	18.6	0	CEL68867.1
conserved hypothetical protein	1	1	1	2242	240.4	0	CBZ50989.1
Hydrolase Cof, related	1	1	1	380	41.8	0	CEL66022.1
Ubiquitin carboxyl-terminal hydrolase, related	2	2	2	2353	255.1	0	CEL68401.1
hypothetical protein BN1204_047170	1	1	1	541	57.1	0	CEL68991.1
hypothetical protein NCLIV_020140	2	2	2	191	20.8	0	XP_003882260.1
HEAT repeat-containing protein	1	1	1	1148	127.4	0	CEL66152.1
hypothetical protein NCLIV_031970	1	1	1	2552	293.3	0	CBZ53410.1
conserved hypothetical protein	1	1	1	105	11.7	0	XP_003884684.1
pyruvate dehydrogenase, putative	1	1	1	617	65.7	0	CEL70612.1
hypothetical protein BN1204_049110	1	1	1	354	39.3	0	CEL69195.1
hypothetical protein BN1204_007480	1	1	1	192	20.8	0	CEL64878.1
unnamed protein product	1	1	1	347	37	0	CBZ52052.1
conserved hypothetical protein	2	2	2	438	47.3	0	CBZ52353.1
hypothetical protein BN1204_045350	1	3	1	1087	116.1	0	CEL68801.1
hypothetical protein BN1204_063800	1	1	1	2206	232.3	0	CEL70700.1
leucine rich repeat protein, putative	1	1	1	1227	130.6	0	CEL65386.1
unnamed protein product	1	1	1	2473	255	0	CBZ50640.1
GL11864, related	1	1	1	503	52.6	0	CEL69347.1
mgc81714 protein, related	1	1	1	857	93.8	0	XP_003880650.1
Atypical MEK-related kinase (incomplete catalytic triad)	1	1	1	796	87.2	0	CBZ52019.1
putative DNA repair protein	1	1	1	353	38.7	0	CBZ53672.1
Fe-S metabolism associated domain-containing protein, putative	1	1	1	351	38.5	0	CEL71192.1
putative signal peptide peptidase domain-containing protein	1	1	1	467	51.8	0	CBZ54674.1
internalin, putative	1	1	1	1285	138.2	0	CEL70742.1
Beta-catenin-like protein 1	1	1	1	599	68.4	0	CEL64151.1
hypothetical protein NCLIV_041970	1	1	1	1177	129.5	0	XP_003881155.1
SRS domain-containing protein	1	1	1	392	41.7	0	XP_003882256.1
putative ras-GTPase-activating protein binding protein	1	1	1	848	88.3	0	XP_003882098.1
SRS domain-containing protein	1	1	1	340	36.2	0	XP_003884626.1
hypothetical protein NCLIV_053610	1	1	1	811	85.7	0	CBZ54934.1
hypothetical protein NCLIV_061040	1	1	1	476	50.5	0	CBZ55680.1
tetratricopeptide repeat-containing protein	1	1	1	1691	185.7	0	CEL69508.1
hypothetical protein BN1204_003055	1	1	1	365	38.7	0	CEL64408.1
Translationally-controlled tumor protein,related	2	2	2	171	19.1	0	XP_003886276.1
dipeptidyl peptidase IV domain-containing protein, putative	1	1	1	1950	210.6	0	CEL70596.1
YOR039Wp-like protein, related	1	1	1	320	34.8	0	CEL67973.1
phospholipase, patatin family protein	1	1	1	739	81.6	0	CEL67601.1
hypothetical protein BN1204_036030	1	2	1	1064	114.1	0	CEL67816.1
hypothetical protein NCLIV_048930	2	2	2	1146	127.5	0	CBZ54464.1
hypothetical protein BN1204_035850	1	1	1	3060	322.6	0	CEL67798.1
hypothetical protein BN1204_008300	1	1	1	2162	225.1	0	CEL64966.1
putative 40S ribosomal protein S29	1	1	1	54	6.5	0	CBZ51959.1
putative eukaryotic initiation factor-2B gamma subunit	2	2	2	528	58.2	0	XP_003885595.1
mgc78841 protein, related	1	1	1	554	60.4	0	XP_003880299.1
B-box zinc finger protein, putative	1	2	1	1361	150.4	0	CEL67736.1
hypothetical protein BN1204_056030	1	1	1	431	48.1	0	CEL69905.1
conserved hypothetical protein	1	1	1	229	24.9	0	XP_003886208.1
unnamed protein product	1	2	1	693	76.1	0	CBZ52682.1
Bradyzoite surface protein BSR4	1	1	1	413	43.5	0	XP_003880567.1
Acyl carrier protein, related	1	1	1	183	19.3	0	CBZ52610.1
conserved hypothetical protein	1	1	1	2001	214.8	0	XP_003882947.1
putative poly(ADP)-ribose polymerase domain-containing protein	1	1	1	355	39.8	0	XP_003879584.1
putative 40S ribosomal protein S30	1	1	1	59	6.6	0	XP_003881290.1
hypothetical protein BN1204_064160	1	1	1	1336	141.9	0	CEL70736.1
hypothetical protein, conserved	1	1	1	604	64.5	0	CEL71297.1
conserved hypothetical protein	1	1	1	438	47.7	0	XP_003882968.1
Ribosomal protein L2, related	1	1	1	530	56.8	0	CEL65008.1
conserved hypothetical protein	1	1	1	5322	564.5	0	CBZ51501.1
YALI0D05697p, related	1	1	1	51	6.2	0	CEL65029.1
hypothetical protein BN1204_011450	1	1	1	190	21.2	0	CEL65291.1
conserved hypothetical protein	1	1	1	560	61.9	0	XP_003880060.1
hypothetical protein NCLIV_064790	1	1	1	1765	192.8	0	XP_003886079.1
nuclear cap-binding protein, putative	1	1	1	287	31	0	CEL68413.1
Note: aThe aminal acid sequences can be retrieved from EuPathDB (http://eupathdb.org/eupathdb/Toxodb.org/toxo/) and (http://www.uniprot.org)with these accession numbers.
